# Supplementary material for: Phosphorus Transformations and Leaching Potential in Rewetting Drained Peatlands: Exploring the Influence of Land Use and Temperature
Source: Research Square preprint supplement (doi:10.21203/rs.3.rs-6583184/v1), 2025-05-12
Supplement: Supplementary file 1 [file 22cd0aadd894f222468dace5.docx]

**Phosphorus Transformations and Leaching Potential in Rewetting Drained Peatlands: Exploring the Influence of Land Use and Temperature**

Atif Muhmooda,b, Haonan Guoa, Lorenzo Pugliesea, Shubiao Wua*

aDepartment of Agroecology, Aarhus University, Blichers Alle 20, 8830 Tjele, Denmark

bInstitute of Soil Chemistry & Environmental Sciences, AARI, Pakistan

Corresponding author: E-mail address: [wushubiao@agro.au.dk](mailto:wushubiao@agro.au.dk)

**Supporting materials:** 9 pages, 4 Figures, 2 Tables

Figure S1. Scheme of sequential phosphorus (P) analysis process


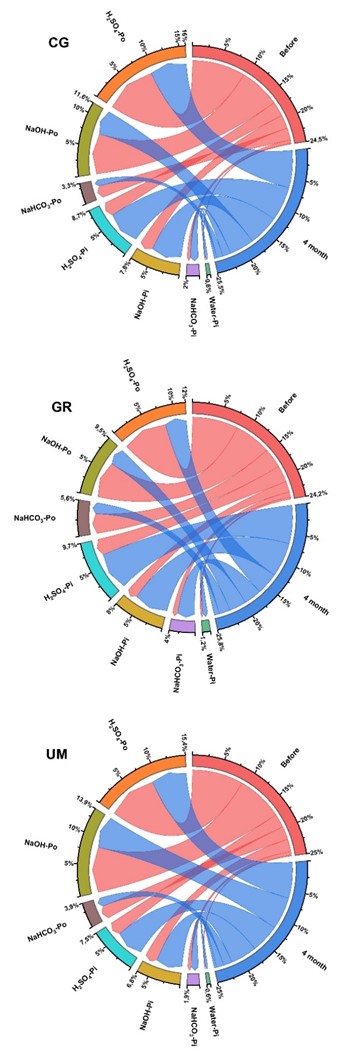


Figure S2. Trend of change in the contents of phosphorus (P) in different fractions in soils under various land uses (CG= cut grass, GR= grazing, UM= unmanaged) after four months of rewetting at 10°C


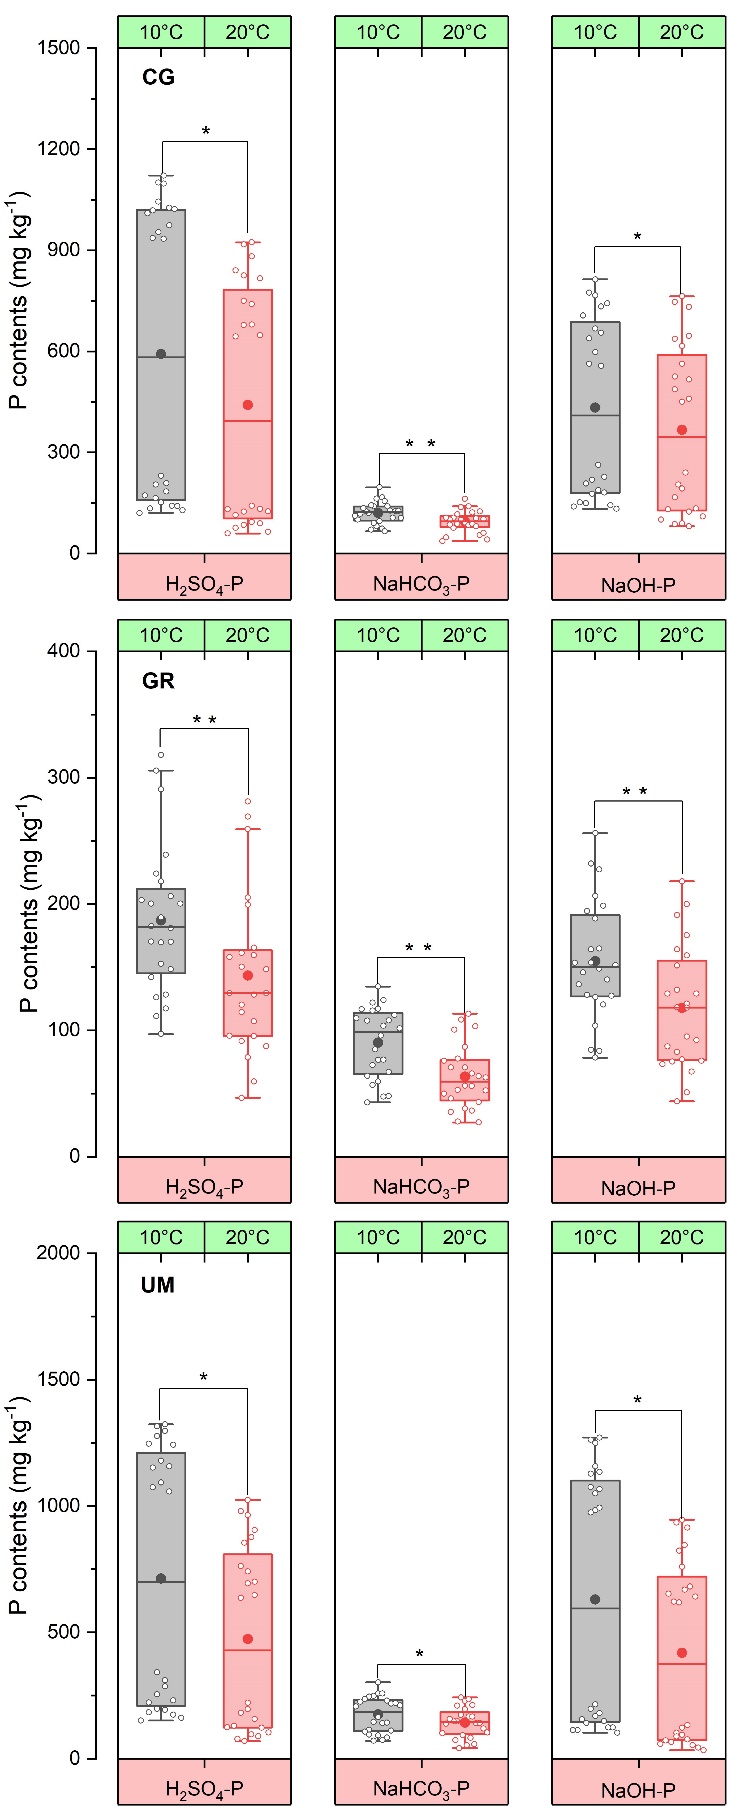


Figure S3. Variation in the contents of organic phosphorus (Po) fractions in soils under various land uses (CG=cut grass, GR= grazing, UM=unmanaged) after four months of rewetting under varying temperature


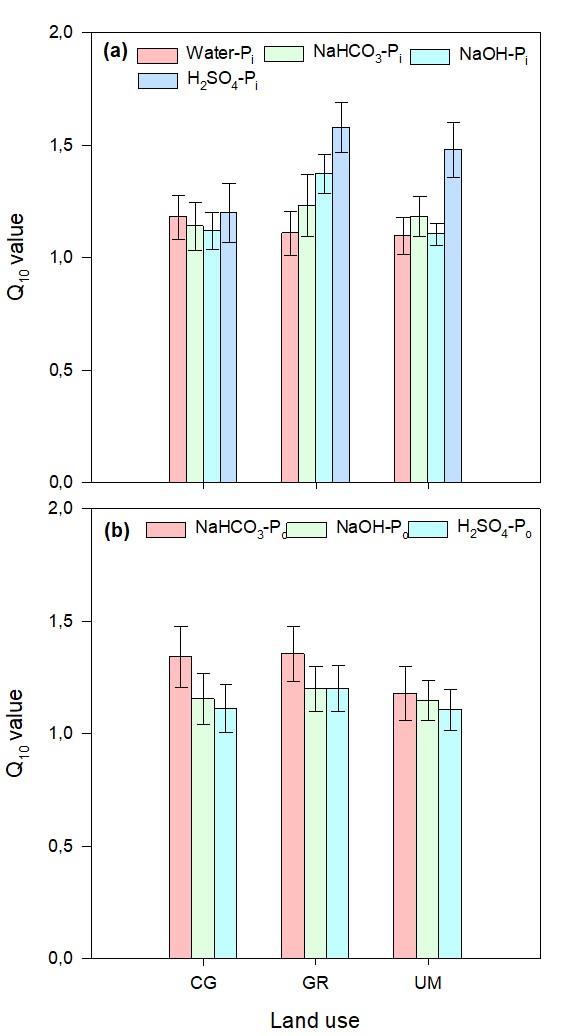


Figure S4. Temperature sensitivity quotient (Q10) values for different phosphorus inorganic (a) and organic (b) fractions in soils under different land uses (CG= cut grass, GR= grazing, UM= unmanaged) after rewetting

**Table S1. Contents of different P fractions (inorganic and organic) in soils under different land under varying rewetting time at 20 °C**

| Location | Land use | | Time | Water-Pi | BD Pi | Alkali Pi | Acid Pi | Total Pi | BD Po | Alkali Po | Acid Po | Total Po | Total P |
| --- | --- | --- | --- | --- | --- | --- | --- | --- | --- | --- | --- | --- | --- |
| Skals | CG | 0 | | 10.32 | 57.80 | 237.9 | 256.4 | 562.5 | 218.9 | 869.2 | 1273 | 2362 | 2924 |
| 1 | | 22.61 | 119.7 | 453.7 | 484.9 | 1086 | 146.8 | 747.5 | 1023 | 1918 | 3004 |
| 2 | | 28.97 | 138.68 | 562.1 | 594.0 | 1323 | 114.7 | 632.8 | 942 | 1690 | 3013 |
| 3 | | 35.67 | 144.0 | 647.0 | 683.4 | 1510 | 98.5 | 534.9 | 863.3 | 1496 | 3007 |
| 4 | | 40.51 | 154.0 | 721.1 | 734.4 | 1647 | 91.0 | 465.6 | 757.0 | 1313 | 2951 |
| GR | 0 | | 13.65 | 30.78 | 85.42 | 116.7 | 246.5 | 156.8 | 274.1 | 380.6 | 811.6 | 1058 |
| 1 | | 21.85 | 78.44 | 189.8 | 210.4 | 500.5 | 108.2 | 202.9 | 269.8 | 581.0 | 1081 |
| 2 | | 25.38 | 110.2 | 232.1 | 308.5 | 676.2 | 78.33 | 166.2 | 174.7 | 419.3 | 1095 |
| 3 | | 28.40 | 113.2 | 275.4 | 386.8 | 803.8 | 58.26 | 123.7 | 132.9 | 314.9 | 1118 |
| 4 | | 33.13 | 121.2 | 319.7 | 419.1 | 893.2 | 46.65 | 84.9 | 105.4 | 237.0 | 1130 |
| UM | 0 | | 14.31 | 71.68 | 356.1 | 378.4 | 820.5 | 286.7 | 1344 | 1437 | 3069 | 3889 |
| 1 | | 28.45 | 115.4 | 493.3 | 574.8 | 1212 | 248.4 | 1122 | 1289 | 2659 | 3871 |
| 2 | | 33.69 | 132.9 | 591.5 | 765.7 | 1524 | 219.2 | 1019 | 1132 | 2371 | 3894 |
| 3 | | 37.88 | 143.6 | 674.8 | 868.9 | 1725 | 172.5 | 936.3 | 1033 | 2141 | 3866 |
| 4 | | 42.14 | 150.9 | 740.5 | 927.9 | 1861 | 152.4 | 855.5 | 961 | 1969 | 3830 |
| Nørre | CG | 0 | | 12.54 | 39.01 | 155.6 | 167.4 | 374.6 | 131.5 | 321.2 | 264.4 | 717.1 | 1092 |
| 1 | | 16.48 | 68.51 | 234.5 | 254.9 | 574.4 | 106.2 | 212.4 | 178.7 | 497.4 | 1084 |
| 2 | | 21.62 | 88.14 | 306.7 | 320.2 | 736.7 | 86.6 | 140.9 | 136.8 | 364.4 | 1101 |
| 3 | | 33.95 | 106.5 | 342.1 | 362.4 | 844.9 | 62.75 | 107.8 | 92.82 | 263.5 | 1108 |
| 4 | | 38.15 | 121.6 | 355.3 | 382.7 | 897.8 | 46.66 | 92.7 | 86.81 | 226.2 | 1124 |
| GR | 0 | | 13.31 | 37.23 | 57.44 | 102.8 | 210.8 | 110.0 | 214.3 | 226.3 | 550.6 | 761.4 |
| 1 | | 29.14 | 85.18 | 114.1 | 156.7 | 385.2 | 78.27 | 132.6 | 171.5 | 382.5 | 767.8 |
| 2 | | 34.33 | 118.8 | 182.7 | 207.8 | 543.7 | 56.27 | 98.53 | 126.5 | 281.6 | 825.4 |
| 3 | | 39.56 | 125.1 | 235.6 | 267.6 | 668.0 | 42.27 | 75.84 | 98.73 | 216.8 | 884.6 |
| 4 | | 40.90 | 136.2 | 256.7 | 302.7 | 736.5 | 38.27 | 56.84 | 67.26 | 162.3 | 898.8 |
| UM | 0 | | 15.43 | 47.87 | 66.72 | 86.99 | 217.0 | 163.7 | 228.2 | 297.6 | 689.6 | 906.6 |
| 1 | | 36.95 | 97.03 | 115.7 | 155.3 | 404.9 | 145.6 | 162.6 | 233.2 | 541.4 | 946.4 |
| 2 | | 40.33 | 123.4 | 179.4 | 188.9 | 532.1 | 108.1 | 119.6 | 176.6 | 404.3 | 939.4 |
| 3 | | 43.29 | 142.4 | 225.4 | 235.3 | 636.4 | 76.46 | 94.35 | 149.4 | 320.1 | 956.5 |
| 4 | | 45.28 | 151.5 | 241.8 | 260.8 | 699.3 | 67.3 | 74.4 | 109.2 | 251.0 | 950.3 |

Time= months, Water-Pi= water extractable inorganic P in mg kg-1, BD-Pi = sodium bicarbonate extractable inorganic P in mg kg-1, Alkali-Pi= NaOH extractable inorganic P in mg kg-1, Acid Pi = H2SO4 extractable inorganic P in mg kg-1, BD-Po = sodium bicarbonate extractable organic P in mg kg-1, Alkali-Po= NaOH extractable organic in mg kg-1, Acid Po = H2SO4 extractable organic P in mg kg-1

**Table S2. Contents of different P fractions (inorganic and organic) in soils under different land under varying rewetting time at 10 °C**

| Location | Land use | Time | Water-Pi | BD Pi | Alkali Pi | Acid Pi | Total Pi | BD Pi | Alkali Pi | Acid Pi | Total Po | Total P |
| --- | --- | --- | --- | --- | --- | --- | --- | --- | --- | --- | --- | --- |
| Skals | CG | 0 | 10.32 | 57.80 | 237.9 | 256.4 | 562.5 | 218.9 | 869.2 | 1273 | 2362 | 2924 |
| 1 | 18.76 | 85.52 | 342.3 | 423.2 | 869.7 | 175.2 | 784.7 | 1107 | 2066 | 2936 |
| 2 | 23.89 | 106.0 | 462.9 | 537.5 | 1130 | 146.2 | 727.5 | 1029 | 1903 | 3034 |
| 3 | 31.22 | 109.7 | 524.3 | 640.8 | 1306 | 129.4 | 653.8 | 988.6 | 1771 | 3077 |
| 4 | 34.48 | 119.1 | 566.9 | 682.6 | 1403 | 109.3 | 572.5 | 954.8 | 1636 | 3039 |
| GR | 0 | 13.65 | 30.78 | 85.42 | 116.7 | 246.5 | 156.8 | 274.1 | 380.7 | 811.6 | 1058 |
| 1 | 15.33 | 65.12 | 156.4 | 186.4 | 423.2 | 124.6 | 238.5 | 304.8 | 667.8 | 1091 |
| 2 | 19.74 | 83.05 | 215.3 | 244.7 | 562.9 | 108.9 | 196.4 | 226.9 | 532.3 | 1095 |
| 3 | 25.07 | 94.72 | 240.0 | 266.4 | 626.2 | 116.2 | 155.8 | 198.6 | 470.5 | 1096 |
| 4 | 30.22 | 117.6 | 250.4 | 288.5 | 686.7 | 97.59 | 131.5 | 168.2 | 397.2 | 1084 |
| UM | 0 | 14.31 | 71.68 | 356.1 | 378.4 | 820.5 | 286.7 | 1344 | 1438 | 3069 | 3889 |
| 1 | 18.64 | 86.11 | 461.5 | 494.9 | 1061 | 263.0 | 1261 | 1312 | 2836 | 3897 |
| 2 | 21.65 | 111.0 | 518.3 | 588.6 | 1239 | 244.4 | 1140 | 1255 | 2639 | 3879 |
| 3 | 34.31 | 125.4 | 613.9 | 658.7 | 1432 | 226.8 | 1064 | 1163 | 2454 | 3886 |
| 4 | 38.05 | 129.3 | 685.7 | 726.5 | 1579 | 212.3 | 984.7 | 1085 | 2271 | 3891 |
| Nørre | CG | 0 | 12.54 | 39.01 | 155.62 | 167.4 | 374.6 | 131.5 | 321.2 | 264.4 | 717.1 | 1092 |
| 1 | 16.47 | 58.51 | 184.5 | 224.8 | 484.3 | 126.2 | 236.4 | 214.7 | 577.4 | 1081 |
| 2 | 21.62 | 78.14 | 247.7 | 260.2 | 607.7 | 110.6 | 190.9 | 166.8 | 468.3 | 1076 |
| 3 | 33.95 | 96.48 | 288.0 | 290.4 | 708.9 | 88.73 | 157.8 | 148.9 | 395.5 | 1104 |
| 4 | 38.15 | 114.6 | 315.2 | 310.7 | 778.8 | 75.66 | 141.1 | 129.8 | 346.5 | 1125 |
| GR | 0 | 13.31 | 37.23 | 57.44 | 102.8 | 210.8 | 110.0 | 214.3 | 226.3 | 550.6 | 761.4 |
| 1 | 23.47 | 58.51 | 94.5 | 143.8 | 320.3 | 86.25 | 165.4 | 184.7 | 436.3 | 756.7 |
| 2 | 26.62 | 78.14 | 156.7 | 176.2 | 437.7 | 72.5 | 145.9 | 156.8 | 375.4 | 813.2 |
| 3 | 32.95 | 96.48 | 178.0 | 196.4 | 503.9 | 62.74 | 107.8 | 132.9 | 303.5 | 807.4 |
| 4 | 36.18 | 114.6 | 205.3 | 220.7 | 576.8 | 52.66 | 96.76 | 123.8 | 273.2 | 850.8 |
| UM | 0 | 15.42 | 47.87 | 66.72 | 86.99 | 217.0 | 163.8 | 228.2 | 297.6 | 689.6 | 906.6 |
| 1 | 20.34 | 76.90 | 104.4 | 135.5 | 337.2 | 150.3 | 186.9 | 259.5 | 596.8 | 934.8 |
| 2 | 31.30 | 94.47 | 146.0 | 165.8 | 437.6 | 121.2 | 157.1 | 216.2 | 494.6 | 932.2 |
| 3 | 39.63 | 109.1 | 183.3 | 203.7 | 530.5 | 91.31 | 130.8 | 187.8 | 410.0 | 940.6 |
| 4 | 45.10 | 116.8 | 206.7 | 246.3 | 610.0 | 84.57 | 113.2 | 145.3 | 343.1 | 954.0 |

Time= months, Water-Pi= water extractable inorganic P in mg kg-1, BD-Pi = sodium bicarbonate extractable inorganic P in mg kg-1, Alkali-Pi= NaOH extractable inorganic P in mg kg-1, Acid Pi = H2SO4 extractable inorganic P in mg kg-1, BD-Po = sodium bicarbonate extractable organic P in mg kg-1, Alkali-Po= NaOH extractable organic in mg kg-1, Acid Po = H2SO4 extractable organic P in mg kg-1
